# Supplementary material
Source: PubMed Central journal article supplement (PMC153723)
Supplement: plntcell_15_5_1159__1.pdf [file plntcell_15_5_1159__1.pdf]

**Table 1.** Flowering time of the *maf2* mutant (a)

| Genotype            | N  | Days of cold treatment (b) | Photoperiod (hours) | Days to visible flower bud | Total leaf number (c) |
|---------------------|----|----------------------------|---------------------|----------------------------|-----------------------|
| <u>Experiment 1</u> |    |                            |                     |                            |                       |
| <i>maf2</i>         | 20 | 3                          | 8                   | 76-94 (81.1 +/- 2.7)       | ND                    |
| wild type           | 11 | 3                          | 8                   | 76-103 (89.8 +/- 5.7)      | ND                    |
| <i>maf2</i>         | 24 | 3                          | 12                  | 28-42 (35.7 +/- 1.5)       | 7-34 (23.1 +/- 2.5)   |
| wild type           | 23 | 3                          | 12                  | 20-46 (39.6 +/- 3.1)       | 6-37 (27.6 +/- 3.5)   |
| <i>maf2</i>         | 24 | 3                          | 24                  | 17-20 (18.1 +/- 0.3)       | 10-13 (11.8 +/- 0.4)  |
| wild type           | 24 | 3                          | 24                  | 16-23 (20.0 +/- 0.7)       | 9-16 (13.0 +/- 0.7)   |
| <u>Experiment 2</u> |    |                            |                     |                            |                       |
| <i>maf2</i>         | 22 | 52                         | 12                  | 17-28 (19.8 +/- 1.2)       | 7-12 (8.5 +/- 0.4)    |
| <i>maf2</i>         | 24 | 3                          | 12                  | 25-35 (28.7 +/- 0.9)       | 9-21 (16.0 +/- 1.7)   |
| wild type           | 33 | 52                         | 12                  | 15-33 (23.0 +/- 1.7)       | 8-14 (10.2 +/- 0.5)   |
| wild type           | 36 | 3                          | 12                  | 22-43 (34.7 +/- 1.6)       | 6-29 (21.5 +/- 1.7)   |
| <u>Experiment 3</u> |    |                            |                     |                            |                       |
| <i>maf2</i>         | 24 | 10                         | 12                  | ND                         | 8-15 (11.1 +/- 0.7)   |
| wild type           | 24 | 10                         | 12                  | ND                         | 16-22 (19.0 +/- 0.8)  |
| <u>Experiment 4</u> |    |                            |                     |                            |                       |
| <i>maf2</i>         | 12 | 3                          | 12                  | 21-43 (34.8 +/- 4.1)       | ND                    |
| wild type           | 12 | 3                          | 12                  | 34-48 (44.0 +/- 2.9)       | ND                    |
| <i>maf2</i>         | 12 | 6                          | 12                  | 22-46 (33.3 +/- 5.9)       | ND                    |
| wild type           | 12 | 6                          | 12                  | 22-48 (39.9 +/- 6.1)       | ND                    |
| <i>maf2</i>         | 12 | 10                         | 12                  | 19-32 (26.5 +/- 3.0)       | ND                    |
| wild type           | 12 | 10                         | 12                  | 26-48 (39.3 +/- 3.0)       | ND                    |
| <i>maf2</i>         | 12 | 15                         | 12                  | 18-32 (24.2 +/- 2.4)       | ND                    |
| wild type           | 12 | 15                         | 12                  | 34-43 (38.5 +/- 1.9)       | ND                    |
| <i>maf2</i>         | 12 | 21                         | 12                  | 16-21 (18.0 +/- 1.1)       | 8-11 (8.5 +/- 0.6)    |
| wild type           | 12 | 21                         | 12                  | 33-43 (36.9 +/- 1.7)       | ND                    |
| <i>maf2</i>         | 12 | 85                         | 12                  | 15-20 (18.3 +/- 0.9)       | 7-9 (7.9 +/- 0.6)     |
| wild type           | 11 | 85                         | 12                  | 14-19 (16.4 +/- 1.3)       | 7-9 (7.5 +/- 0.6)     |

## Notes:

(a) Range of values obtained followed by mean +/- Standard Error with 95% confidence limits attached (parentheses)

(b) Duration of cold treatment on imbibed seeds at 4 degrees C, before transfer to growth room

(c) Number of leaf primordia produced by primary shoot meristem before first flower.

N = number of plants in population

wild type = non-transformed Columbia plants

ND = Not determined
