# Supplementary material
Source: PubMed Central journal article supplement (PMC153723)
Supplement: plntcell_15_5_1159__2.pdf [file plntcell_15_5_1159__2.pdf]

**Table 2.** Flowering time of 35S:MAF2-5 Columbia T1 lines (a)

| Genotype            | Phenotype (b,c)     | Penetrance | Days to visible flower bud | Total leaf number    |
|---------------------|---------------------|------------|----------------------------|----------------------|
| <u>Experiment 5</u> |                     |            |                            |                      |
| Control (d)         | wild-type           | 43/43      | 17-25 (21.1 +/- 0.5)       | 9-18 (14.3 +/- 0.7)  |
| 35S:MAF2            | early               | 13/20      | 11-15 (12.8 +/- 0.7)       | 5-8 (6.2 +/- 0.6)    |
|                     | slightly early      | 1/20       | 15-15 (15.0 +/- ND)        | 9-9 (9.0 +/- ND)     |
|                     | wild-type           | 3/20       | 21-22 (21.3 +/- 1.4)       | 10-13 (11.3 +/- 3.8) |
|                     | slightly late       | 2/20       | 27-27 (27.0 +/- ND)        | 14-16 (15.0 +/- ND)  |
|                     | late                | 1/20       | 27-27 (27.0 +/- ND)        | 22-22 (22.0 +/- ND)  |
| 35S:MAF3            | early               | 6/10       | 13-14 (13.5 +/- 0.6)       | 7-8 (7.7 +/- 0.5)    |
|                     | slightly early      | 1/10       | 16-16 (16.0 +/- ND)        | 9-9 (9.0 +/- ND)     |
|                     | wild-type           | 3/10       | 18-21 (19.3 +/- 3.8)       | 10-14 (12.0 +/- 5.0) |
| 35S:MAF4 (e)        | early               | 5/13       | 13-16 (15.2 +/- 1.6)       | 6-7 (6.2 +/- 0.6)    |
|                     | slightly early (f)  | 3/13       | 18-27 (21.0 +/- 12.9)      | 7-8 (7.3 +/- 1.4)    |
|                     | wild-type           | 2/13       | 23-25 (24.0 +/- ND)        | 10-15 (12.5 +/- ND)  |
|                     | slightly late (f)   | 1/13       | 70-70 (70.0 +/- ND)        | 15-15 (15.0 +/- ND)  |
|                     | arrested growth (g) | 2/13       | ND                         | ND                   |
| 35S:MAF5            | early               | 5/10       | 14-15 (14.2 +/- 0.6)       | 6-7 (6.2 +/- 0.6)    |
|                     | wild-type           | 5/10       | 17-25 (20.8 +/- 4.0)       | 9-16 (12.6 +/- 3.8)  |
| <u>Experiment 6</u> |                     |            |                            |                      |
| Control (h)         | wild-type           | 15/15      | 21-30 (25.3 +/- 1.3)       | 9-15 (11.5 +/- 1.1)  |
| 35S:MAF2            | early               | 5/19       | 15-20 (18.0 +/- 2.6)       | 7-8 (7.4 +/- 0.7)    |
|                     | slightly early      | 2/19       | 22-23 (22.5 +/- ND)        | 8-8 (8.0 +/- ND)     |
|                     | wild-type           | 10/19      | 22-28 (23.5 +/- 1.3)       | 9-14 (11.1 +/- 1.0)  |
|                     | late                | 2/19       | 35-42 (38.5 +/- ND)        | 26-29 (27.5 +/- ND)  |
| 35S:MAF3            | early               | 5/8        | 16-20 (17.6 +/- 2.9)       | 7-8 (7.4 +/- 0.7)    |
|                     | slightly early      | 2/8        | 17-17 (17.0 +/- ND)        | 9-11 (10.0 +/- ND)   |
|                     | wild-type           | 1/8        | 21-21 (21.0 +/- ND)        | 11-11 (11.0 +/- ND)  |
| 35S:MAF4 (e)        | slightly early      | 2/7        | 20-27 (23.5 +/- ND)        | 6-10 (8.0 +/- ND)    |
|                     | wild-type           | 5/7        | 24-30 (27.0 +/- 3.5)       | 10-11 (10.3 +/- 0.8) |
| 35S:MAF5            | early               | 1/19       | 20-20 (20.0 +/- ND)        | 8-8 (8.0 +/- ND)     |
|                     | slightly early      | 2/19       | 20-20 (20.0 +/- ND)        | 11-13 (12.0 +/- ND)  |
|                     | wild-type           | 15/19      | 21-27 (23.9 +/- 0.9)       | 9-15 (12.6 +/- 1.2)  |
|                     | slightly late       | 1/19       | 27-27 (27.0 +/- ND)        | 18-18 (18.0 +/- ND)  |

## Notes:

Except where otherwise indicated, transgenic plants were selected MS agar plates containing kanamycin at 50mg/l  
(a) Range of values obtained followed by mean +/- Standard Error with 95% confidence limits attached (parentheses) are shown for each class.

(b) Plants classified as early or late, flowered outside the wild type range in terms of both days to first open flower and total leaf number.

(c) Plants classified as slightly early or slightly late flowered outside wild type range in terms of either days to first open flower or total leaf number.

(d) Control is wild type Columbia.

(e) The majority of 35S:MAF4 lines were small and stunted, and some showed (f) a slow rate of growth

(g) These plants senesced and died at the seedling stage without producing flower buds.

(h) Controls for experiment 6 were Columbia T2 transformants from a mix of lines, containing the 'empty' transformation vector, and selected on kanamycin plates.

Penetrance = number of plants out of population showing phenotype

Plants grown under 24 hours light at 20-25 degrees Celsius in all three experiments.

ND = not determined

Note that for unknown reasons, 35S:*MAF4* lines were often very small, stunted, displayed a slow growth rate, and formed poorly developed inflorescences that set relatively few seeds. Additionally, some lines exhibited premature senescence of rosette leaves, while others arrested growth during the seedling stage and senesced without flowering. Despite these deleterious effects however, alterations in flowering time could still be discerned. Such effects were not observed in the 35S:*MAF2*, 35S:*MAF3*, and 35S:*MAF5* lines.
