# Supplementary material
Source: PubMed Central journal article supplement (PMC153723)
Supplement: plntcell_15_5_1159__3.pdf [file plntcell_15_5_1159__3.pdf]

**Table 3. Flowering time phenotypes of 35S:MAF2-5 T2 Columbia & Landsberg lines (a)**

| Genotype                       | Line | N  | T1 phenotype       | T2 phenotype   | Days of cold treatment (b) | P'period (hours) | Days to visible flower bud | Total leaf number    |
|--------------------------------|------|----|--------------------|----------------|----------------------------|------------------|----------------------------|----------------------|
| <u>Experiment 7 (Columbia)</u> |      |    |                    |                |                            |                  |                            |                      |
| 35S:MAF2                       | 16   | 13 | late               | late           | 3                          | 24               | 25-39 (32.5 +/- 2.1)       | 17-35 (25.9 +/- 3.5) |
| 35S:MAF2                       | 24   | 16 | late               | late           | 3                          | 24               | 32-38 (34.9 +/- 1.2)       | 25-34 (29.6 +/- 1.4) |
| 35S:MAF2                       | 32   | 20 | early              | wild-type      | 3                          | 24               | 21-23 (21.5 +/- 0.4)       | 10-18 (14.4 +/- 0.9) |
| 35S:MAF2                       | 36   | 15 | early              | wild-type      | 3                          | 24               | 18-21 (20.8 +/- 0.4)       | 9-14 (12.1 +/- 0.9)  |
| 35S:MAF3                       | 2    | 17 | early              | early          | 3                          | 24               | 16-20 (17.4 +/- 0.7)       | 8-14 (9.8 +/- 0.8)   |
| 35S:MAF3                       | 9    | 16 | early              | early          | 3                          | 24               | 17-21 (19.1 +/- 0.7)       | 8-15 (11.5 +/- 1.0)  |
| 35S:MAF4                       | 4    | 11 | slightly early (c) | ND             | 3                          | 24               | 26-32 (29.0 +/- 1.4)       | 11-16 (13.4 +/- 1.2) |
| 35S:MAF4                       | 11   | 9  | slightly early (d) | wild-type      | 3                          | 24               | 17-25 (22.1 +/- 1.7)       | 7-15 (10.7 +/- 2.5)  |
| 35S:MAF5                       | 10   | 19 | early              | wild-type      | 3                          | 24               | 20-23 (21.6 +/- 0.5)       | 13-17 (14.7 +/- 0.6) |
| 35S:MAF5                       | 25   | 16 | early              | wild-type      | 3                          | 24               | 21-25 (22.0 +/- 0.7)       | 11-18 (13.6 +/- 0.9) |
| 35S:MAF5                       | 7    | 14 | early              | wild-type      | 3                          | 24               | 21-21 (21.0 +/- 0)         | 11-16 (13.4 +/- 1.0) |
| Control (e)                    | NA   | 47 | wild-type          | wild-type      | 3                          | 24               | 18-23 (21.0 +/- 0.3)       | 10-18 (13.8 +/- 0.6) |
| 35S:MAF2                       | 16   | 10 | late               | late           | 3                          | 12               | 59-68 (63.8 +/- 3.0)       | 38-49 (44.0 +/- 2.4) |
| 35S:MAF2                       | 24   | 17 | late               | late           | 3                          | 12               | 52-66 (59.4 +/- 2.0)       | 31-54 (46.2 +/- 3.3) |
| 35S:MAF2                       | 32   | 17 | early              | slightly early | 3                          | 12               | 28-40 (34.3 +/- 1.9)       | 11-24 (17.0 +/- 1.9) |
| 35S:MAF2                       | 36   | 14 | early              | slightly early | 3                          | 12               | 22-46 (33.3 +/- 3.8)       | 7-23 (14.3 +/- 3.1)  |
| 35S:MAF3                       | 2    | 14 | early              | early          | 3                          | 12               | 21-39 (27.1 +/- 2.7)       | 7-18 (10.7 +/- 1.8)  |
| 35S:MAF3                       | 9    | 18 | early              | early          | 3                          | 12               | 21-42 (31.1 +/- 3.2)       | 7-24 (13.7 +/- 2.1)  |
| 35S:MAF3                       | 10   | 19 | early              | slightly early | 3                          | 12               | 28-42 (35.5 +/- 1.9)       | 10-29 (17.0 +/- 2.1) |
| 35S:MAF4                       | 4    | 20 | slightly early (c) | ND             | 3                          | 12               | ND                         | ND                   |
| 35S:MAF4                       | 11   | 8  | slightly early (d) | ND             | 3                          | 12               | 22-49 (30.3 +/- 10.5)      | 7-30 (21.0 +/- 7.3)  |
| 35S:MAF5                       | 10   | 17 | early              | wild-type      | 3                          | 12               | 27-45 (39.2 +/- 2.4)       | 16-38 (24.3 +/- 2.9) |
| 35S:MAF5                       | 25   | 13 | early              | wild-type      | 3                          | 12               | 23-45 (35.8 +/- 5.0)       | 9-28 (20.3 +/- 3.6)  |
| 35S:MAF5                       | 7    | 7  | early              | wild-type      | 3                          | 12               | 30-40 (34.1 +/- 4.2)       | 11-27 (16.9 +/- 5.4) |
| Control (e)                    | NA   | 35 | wild-type          | wild-type      | 3                          | 12               | 21-49 (38.5 +/- 2.3)       | 8-32 (21.5 +/- 2.2)  |
| <u>Experiment 8 (Columbia)</u> |      |    |                    |                |                            |                  |                            |                      |
| 35S:MAF2                       | 16   | 16 | late               | late           | 56                         | 24               | 29-37 (32.8 +/- 1.2)       | 21-31 (25.8 +/- 1.3) |
| 35S:MAF2                       | 16   | 16 | late               | late           | 3                          | 24               | 29-38 (32.4 +/- 1.3)       | 24-33 (28.9 +/- 1.3) |
| control (e)                    | NA   | 16 | NA                 | NA             | 56                         | 24               | 14-17 (15.1 +/- 0.6)       | 7-11 (8.9 +/- 0.5)   |
| control (e)                    | NA   | 16 | NA                 | NA             | 3                          | 24               | 21-22 (21.1 +/- 0.2)       | 13-18 (15.1 +/- 1.0) |
| control (f)                    | NA   | 16 | NA                 | NA             | 56                         | 24               | 14-18 (14.9 +/- 0.9)       | 7-10 (8.3 +/- 0.6)   |
| control (f)                    | NA   | 16 | NA                 | NA             | 3                          | 24               | 20-23 (21.2 +/- 0.7)       | 13-21 (16.3 +/- 1.7) |
| <u>Experiment 9 (Columbia)</u> |      |    |                    |                |                            |                  |                            |                      |
| 35S:MAF2                       | 16   | 10 | late               | late           | 76                         | 12               | ND                         | 35-48 (40.0 +/- 3.3) |
| 35S:MAF2                       | 16   | 10 | late               | late           | 3                          | 12               | ND                         | 38-49 (44.0 +/- 2.4) |
| control (f)                    | NA   | 10 | NA                 | NA             | 76                         | 12               | 16-21 (18.5 +/- 1.8)       | 6-8 (6.9 +/- 0.6)    |

|                                  |     |     |    |               |   |    |                      |                      |
|----------------------------------|-----|-----|----|---------------|---|----|----------------------|----------------------|
| control (f)                      | NA  | 24  | NA | NA            | 3 | 12 | 24-38 (30.2 +/- 1.9) | 10-22 (16.2 +/- 1.4) |
| <u>Experiment 10 (Landsberg)</u> |     |     |    |               |   |    |                      |                      |
| 35S:MAF2                         | 207 | 16  | ND | late          | 5 | 24 | 20-24 (21.6 +/- 0.7) | ND                   |
| 35S:MAF2                         | 210 | 16  | ND | late          | 5 | 24 | 27-36 (29.9 +/- 1.2) | ND                   |
| 35S:MAF3                         | 102 | 16  | ND | slightly late | 5 | 24 | 17-24 (19.7 +/- 1.2) | ND                   |
| 35S:MAF3                         | 105 | 16  | ND | wild-type     | 5 | 24 | 17-21 (18.4 +/- 0.7) | ND                   |
| 35S:MAF3                         | 115 | 16  | ND | late          | 5 | 24 | 20-25 (22.6 +/- 1.0) | ND                   |
| 35S:MAF3                         | 116 | 16  | ND | late          | 5 | 24 | 20-22 (21.1 +/- 0.4) | ND                   |
| 35S:MAF4                         | 3   | 8   | ND | late          | 5 | 24 | 22-42 (30.1 +/- 4.8) | ND                   |
| (d)                              |     |     |    |               |   |    |                      |                      |
| 35S:MAF4                         | 101 | 18  | ND | late          | 5 | 24 | 20-28 (23.3 +/- 0.9) | ND                   |
| (d)                              |     |     |    |               |   |    |                      |                      |
| 35S:MAF4                         | 202 | 14  | ND | slightly late | 5 | 24 | 17-26 (19.8 +/- 1.6) | ND                   |
| (d)                              |     |     |    |               |   |    |                      |                      |
| 35S:MAF4                         | 204 | 12  | ND | late          | 5 | 24 | 23-28 (25.2 +/- 1.3) | ND                   |
| (d)                              |     |     |    |               |   |    |                      |                      |
| 35S:MAF5                         | 101 | 5   | ND | slightly late | 5 | 24 | 18-22 (20.2 +/- 1.8) | ND                   |
| 35S:MAF5                         | 103 | 16  | ND | slightly late | 5 | 24 | 18-20 (19.3 +/- 0.5) | ND                   |
| 35S:MAF5                         | 203 | 16  | ND | slightly late | 5 | 24 | 17-20 (19.6 +/- 0.5) | ND                   |
| 35S:MAF5                         | 204 | 14  | ND | slightly late | 5 | 24 | 20-21 (20.4 +/- 0.3) | ND                   |
| control (f)                      | NA  | 103 | NA | wild-type     | 5 | 24 | 16-20 (18.4 +/- 0.7) | ND                   |
| 35S:MAF2                         | 207 | 17  | ND | late          | 5 | 12 | 21-49 (37.9 +/- 4.8) | ND                   |
| 35S:MAF2                         | 210 | 13  | ND | late          | 5 | 12 | 34-80 (72.6 +/- 7.7) | ND                   |
| 35S:MAF3                         | 102 | 14  | ND | slightly late | 5 | 12 | 21-30 (24.2 +/- 1.6) | ND                   |
| 35S:MAF3                         | 105 | 16  | ND | slightly late | 5 | 12 | 20-37 (25.1 +/- 2.4) | ND                   |
| 35S:MAF3                         | 115 | 16  | ND | late          | 5 | 12 | 56-80 (66.5 +/- 4.2) | ND                   |
| 35S:MAF3                         | 116 | 14  | ND | late          | 5 | 12 | 49-65 (57.2 +/- 4.1) | ND                   |
| 35S:MAF4                         | 3   | 9   | ND | late          | 5 | 12 | 49-70 (59.4 +/- 5.7) | ND                   |
| (d)                              |     |     |    |               |   |    |                      |                      |
| 35S:MAF4                         | 101 | 11  | ND | late          | 5 | 12 | 42-69 (56.6 +/- 5.4) | ND                   |
| (d)                              |     |     |    |               |   |    |                      |                      |
| 35S:MAF4                         | 202 | 8   | ND | late          | 5 | 12 | 24-41 (33.4 +/- 5.2) | ND                   |
| (d)                              |     |     |    |               |   |    |                      |                      |
| 35S:MAF4                         | 204 | 14  | ND | late          | 5 | 12 | 26-60 (47.2 +/- 6.2) | ND                   |
| (d)                              |     |     |    |               |   |    |                      |                      |
| 35S:MAF5                         | 101 | 9   | ND | slightly late | 5 | 12 | 21-35 (24.2 +/- 3.7) | ND                   |
| 35S:MAF5                         | 103 | 16  | ND | slightly late | 5 | 12 | 18-29 (24.4 +/- 1.9) | ND                   |
| 35S:MAF5                         | 203 | 18  | ND | late          | 5 | 12 | 21-31 (25.5 +/- 1.7) | ND                   |
| 35S:MAF5                         | 204 | 10  | ND | late          | 5 | 12 | 29-41 (36.6 +/- 3.3) | ND                   |
| control (f)                      | NA  | 93  | NA | wild-type     | 5 | 12 | 18-34 (22.9 +/- 0.6) | ND                   |

Notes:

Except where otherwise indicated, transgenic plants were selected MS agar plates containing kanamycin at 50mg/l

(a) Range of values obtained followed by mean +/- Standard Error with 95% confidence limits attached (brackets)

- (b) Duration of cold treatment on imbibed seeds at 4 degrees C, before transfer to growth room
  - (c) Plants were small, produced leaves at a slower rate than wild-type, and showed premature leaf senescence.
  - (d) Plants were distinctly small compared to wild type.
  - (e) Controls were Columbia T2 transformants from a mix of lines, containing the 'empty' transformation vector, selected on kanamycin plates.
  - (f) Wild type, not selected on kanamycin
  - (g) Not selected on kanamycin
- NA = Not applicable  
ND = Not determined  
N = number of plants in population
